# Supplementary material for: Synthesis and investigation of the boron cluster anion [7-(2′-pyridyl)-7,8-nido-dicarbaundecaborate] and its protonated form
Source: Royal Society of Chemistry journal article supplement (doi:10.1039/b705160c), 2007-01-01

**Figure S-1.-**  $^{11}\text{B}\{^1\text{H}\}\text{-}^{11}\text{B}\{^1\text{H}\}$  2D COSY NMR spectrum of  $[\text{NMe}_4][\mathbf{1}]$ .

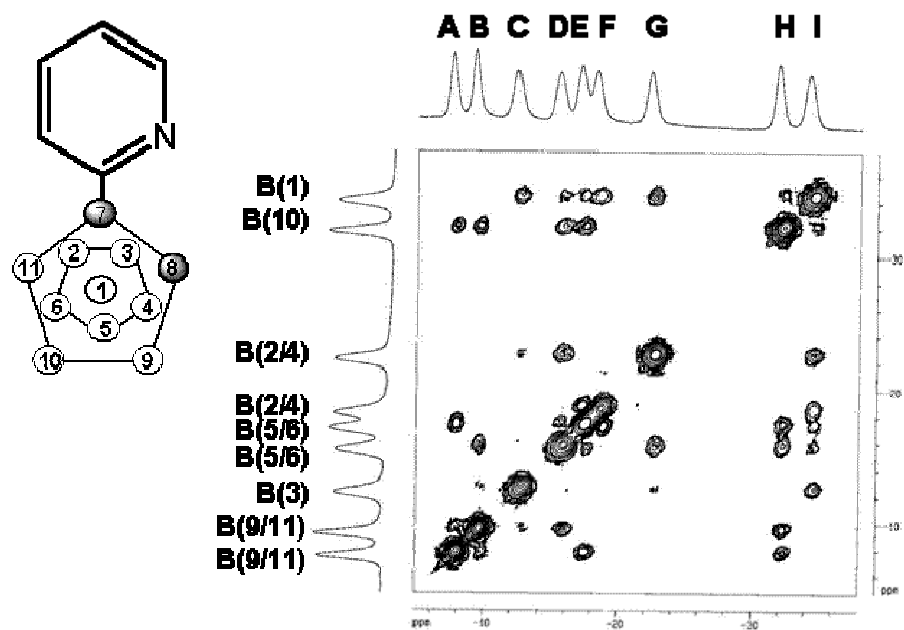

**Figure S-2.-**  $^{11}\text{B}\{^1\text{H}\}\text{-}^{11}\text{B}\{^1\text{H}\}$  2D COSY NMR spectrum of **2**.

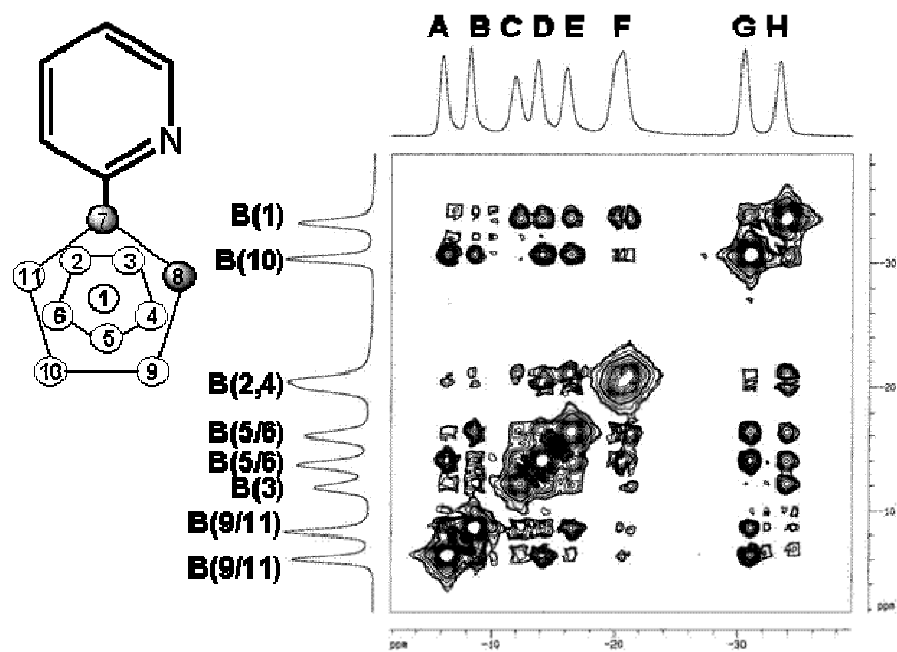

**Figure S-3.**  $^{11}\text{B}$  selective irradiation  $^1\text{H}$  NMR spectra of **2**. Arrows indicate which boron was selectively irradiated. Colored areas are B-H related to boron irradiated.

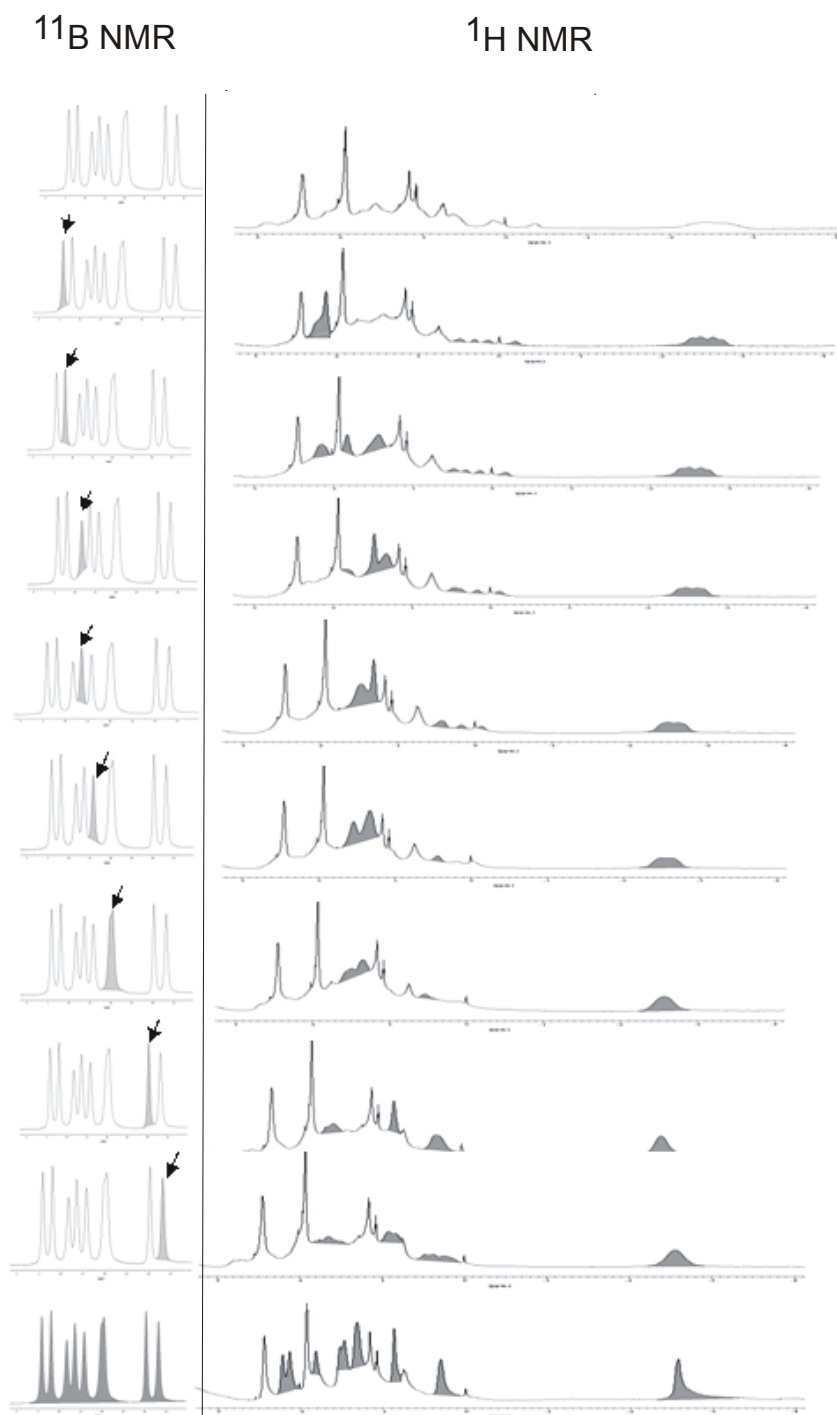

**Figure S-4.**- A plot of  $^1\text{H}$  versus  $^{11}\text{B}$  chemical shifts for the individual  $\text{BH}_{\text{exo}}$  units for **2**.

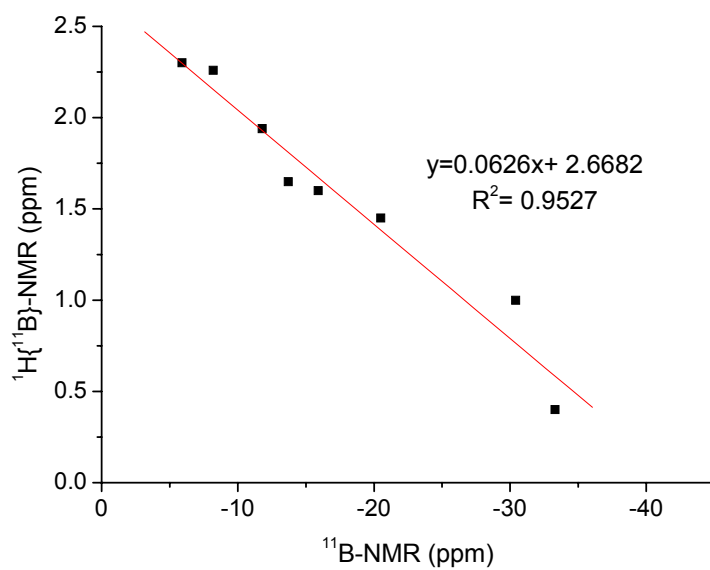

**Figure S-5.**- MALDI-TOF-MS of  $[\text{NMe}_4][\mathbf{1}]$  (T= calculated, E=Experimental).

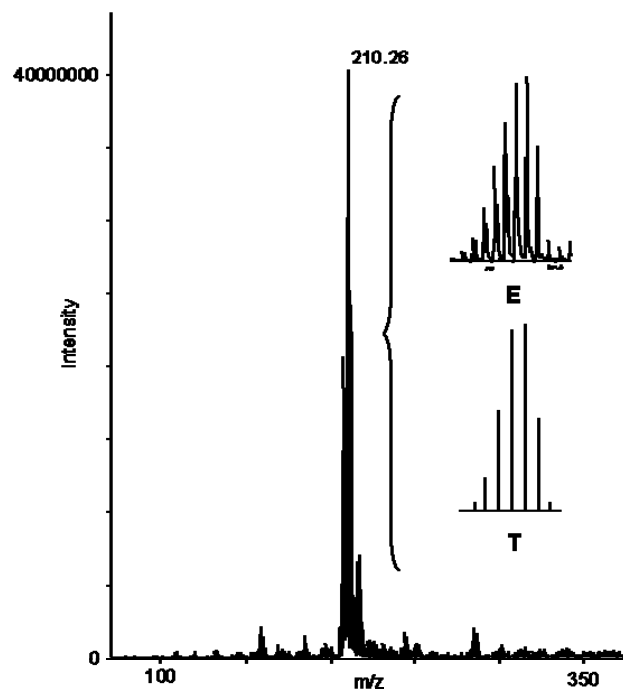

**Figure S-6.-** a) UV spectra of [NMe<sub>4</sub>][**1**] in 6.5 mM solution of NaCl in acetonitrile/water mixture 30% (v/v) and, b) UV spectra of **2** in 6.5 mM solution of NaCl in acetonitrile/water mixture 60% (v/v).

a)

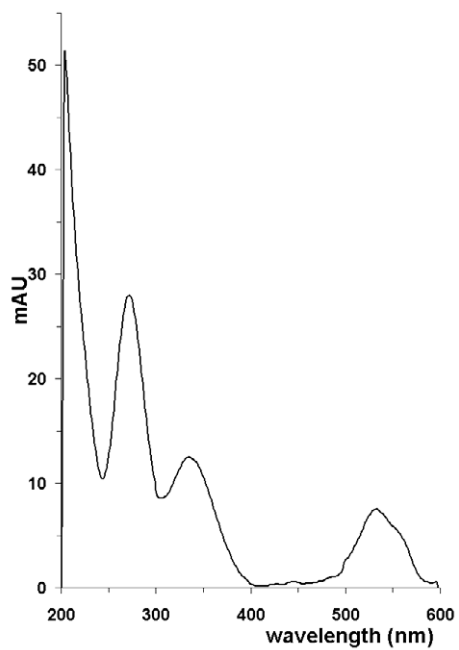

b)

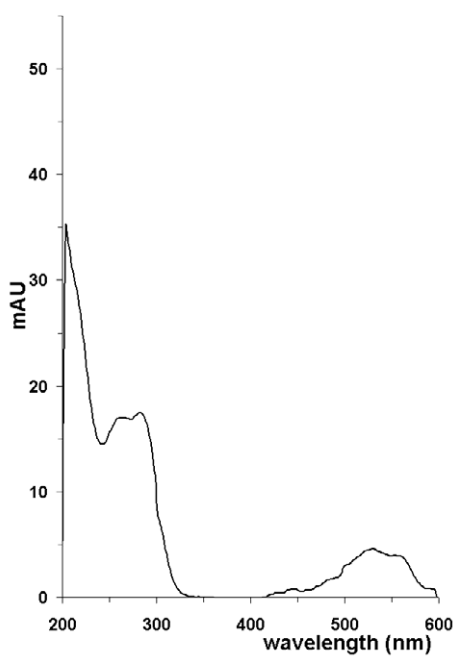

Supplement: b705160c.pdf [file b705160c.pdf]
